# Supplementary material for: An Orf-Virus (ORFV)-Based Vector Expressing a Consensus H1 Hemagglutinin Provides Protection against Diverse Swine Influenza Viruses
Source: MDPI journal article supplement (doi:10.3390/v15040994), 2023-04-18
Supplement: s1 [file s1]

| Access number | Name                                  | Submission date |
|---------------|---------------------------------------|-----------------|
| KJ683871      | A/swine/South Dakota/A01480750/2014   | 3/27/14         |
| KY802128      | A/swine/North Carolina/A01672751/2017 | 2/8/17          |
| MF692781      | A/swine/North Carolina/A01785281/2017 | 7/28/17         |
| MF150370      | A/swine/North Carolina/A02214775/2017 | 4/19/17         |
| KY014451      | A/swine/North Carolina/A01781336/2016 | 9/14/16         |
| KY499597      | A/swine Oklahoma/A01671948/2016       | 12/22/16        |
| KX772389      | A/swine/Iowa/A01778178/2016           | 8/3/16          |
| KU379628      | A/swine/Oklahoma/A01798209/2015       | 11/23/15        |
| MF455481      | A/swine/Iowa/A02216456/2017           | 5/23/17         |
| MF359749      | A/swine/Iowa/A01785264/2017           | 5/30/17         |
| KX380247      | A/swine/Illinois/A01775513/2016       | 5/19/16         |
| KX185834      | A/swine/Illinois/A01895276/2016       | 4/8/16          |
| MF000481      | A/swine/Missouri/A01672817/2017       | 2/6/17          |
| KR265520      | A/swine/Missouri/A01554380/2015       | 4/24/15         |
| MF144718      | A/swine/Iowa/A02215041/2017           | 5/19/17         |
| MF348036      | A/swine/North Carolina/A02215469/2017 | 5/17/17         |
| KY744620      | A/swine/Indiana/A01672825/2017        | 2/1/17          |
| MG383438      | A/swine/Iowa/A01678511/2017           | 1/11/17         |
| KY995615      | A/swine/Nebraska/A02214231/2017       | 3/22/17         |
| MF289445      | A/swine/Iowa/A02215255/2017           | 5/8/17          |
| KY744614      | A/swine/Iowa/A01672823/2017           | 2/2/17          |
| MF348031      | A/swine/Missouri/A02216048/2017       | 5/16/17         |
| KX298117      | A/swine/North Carolina/A01774921/2016 | 5/9/16          |
| KU942633      | A/swine/Indiana/A01732606/2016        | 2/29/16         |
| KU877392      | A/swine/North Carolina/A01731797/2016 | 2/17/16         |
| KX518666      | A/swine/North Carolina/A01776155/2016 | 5/31/16         |
| KU942615      | A/swine/North Carolina/A01732321/2016 | 2/22/16         |
| KR863122      | A/swine/Illinois/A01820485/2015       | 5/22/15         |
| KU695675      | A/swine/North Carolina/A01730376/2016 | 1/22/16         |

|                 |                                           |          |
|-----------------|-------------------------------------------|----------|
| <b>EU604689</b> | A/swine/OH/511445/2007                    | 4/1/08   |
| <b>KU680986</b> | A/swine/Iowa/A01941927/2016               | 1/14/16  |
| <b>MF471674</b> | A/swine/Iowa/A02217286/2017               | 6/15/17  |
| <b>MF613966</b> | A/swine/Iowa/A02218176/2017               | 6/28/17  |
| <b>MF582488</b> | A/swine/Nebraska/A01785277/2017           | 7/14/17  |
| <b>KX150858</b> | A/swine/Oklahoma/A01676763/2016(H1N2)     | 4/27/16  |
| <b>MF455467</b> | A/swine/Indiana/A02217290/2017(H1N2)      | 7/10/17  |
| <b>KY766094</b> | A/swine/Minnesota/A01932042/2017(H1N2)    | 3/13/17  |
| <b>KY522887</b> | A/swine/Iowa/A01672046/2017               | 1/5/17   |
| <b>MF375251</b> | A/swine/Iowa/A02216454/2017               | 5/22/17  |
| <b>MF664424</b> | A/swine/Oklahoma/A01785279/2017           | 7/18/17  |
| <b>KY941155</b> | A/swine/Missouri/A01667101/2017           | 3/8/17   |
| <b>MF092725</b> | A/swine/Michigan/A02214665/2017           | 3/28/17  |
| <b>MF092737</b> | A/swine/Iowa/A02214655/2017(H1N2)         | 5/11/17  |
| <b>KM402870</b> | A/swine/South Dakota/A01482581/2014(H1N2) | 8/27/14  |
| <b>KY631495</b> | A/swine/Iowa/A01672519/2017               | 1/20/17  |
| <b>KY412996</b> | A/swine/Iowa/A01668923/2016               | 11/30/16 |
| <b>MF455505</b> | A/swine/Iowa/A02216639/2017               | 6/7/17   |
| <b>MF488955</b> | A/swine/South Dakota/A01678497/2017(H1N2) | 7/14/17  |
| <b>KX602673</b> | A/swine/Minnesota/A01678467/2016(H1N2)    | 7/25/16  |
| <b>MF150384</b> | A/swine/Illinois/A02214842/2017           | 4/10/17  |
| <b>KY995593</b> | A/swine/Indiana/A01667098/2017            | 3/3/17   |
| <b>KY210992</b> | A/swine/North Carolina/A01782869/2016     | 10/27/16 |
| <b>MF455485</b> | A/swine/Iowa/A02216640/2017               | 6/6/17   |
| <b>MF092761</b> | A/swine/North Carolina/A02214480/2017     | 4/7/17   |
| <b>KY888291</b> | A/swine/North Carolina/A01932634/2017     | 3/13/17  |
| <b>MF768424</b> | A/swine/Pennsylvania/A02218034/2017       | 7/5/17   |
| <b>MF768426</b> | A/swine/Iowa/A02217969/2017               | 6/28/17  |
| <b>KU877362</b> | A/swine/North Carolina/A01731857/2016     | 2/11/16  |
| <b>KY744610</b> | A/swine/North Carolina/A01672678/2017     | 2/3/17   |
| <b>KY593209</b> | A/swine/North Carolina/A01672380/2017     | 1/19/17  |

|                 |                                       |          |
|-----------------|---------------------------------------|----------|
| <b>KY465593</b> | A/swine/Pennsylvania/A01671487/2016   | 12/12/16 |
| <b>KY873258</b> | A/swine/North Carolina/A01932425/2017 | 2/16/17  |
| <b>KY631499</b> | A/swine/North Carolina/A01672458/2017 | 1/20/17  |

ConH1 sequence:

ATGAAGGCAATACTATTAGTTCTACTATATACATCTACAACCTGCAAATGCCGACAACTATGTAT  
AGGTTATCATGCGAACAACCTCAACTGACACTGTAGACACAGTACTAGAAAAGAATGTAACAGTA  
ACACATTCTGTTAATCTTCTAGAAAACAAGCATAATGGGAACTATGTAACTAAGAGGGGTAG  
CTCCATTGCACTTGGGTAAATGTAACATTGCTGGCTGGCTTCTGGGAAATCCAGAGTGTGACTCA  
CTCTCTACAGCAATCTCATGGTCTTACATTGTAGAAACATCTAATTCAGACAATGGAACGTGTTA  
CCCAGGAGATTTCATAAATTATGAGGAGCTAAGGGAGCAGTTGAGCTCAGTGTATCATTGCGAA  
AGGTTTGAGATATCCCCAAGACAAGCTCATGGCCCAACCATGACACAGACAAAGGTGTGACGT  
CAGCATGTCAACATGCTGGGAGAGGAAGCTTCTACAGAAATTTGTTATGGCTGGTCAAAAAAGA  
AAATTCATATCCAAAGATCAACAAATCCTACACTAACACTAGAGGGAAAGAAGTTCTAGTGCTA  
TGGGCCATTACACACCCGCCTACCAAGTGCCGACCAACAAAGTCTATACCAAATGCAAATGCCT  
ATGTTTTTGTGGGGTCATCAAAATACAGCAGGAAGTTTCGAGCCAGAAATAGCAACAAGACCCAA  
AGTGAGGAACCAACAGGGAGAATGAACTATTACTGGACACTAGTAGAGCCTGGAGACAATAT  
AACATTGCAAGCAACTGGAAATCTGGTGGTACCGAGATATGCCTTCGCATTGAAAAGAAATTCT  
GGATCCGGTATTATCATTTTCAGATACATCAGTCCACGATTGTGATACGACTTGTGACACCCAA  
TGGTGCTATAAACACCAGCCTCCCATTTCAAAACATACACCCAGTCACAATTGGAGAATGTCCA  
AAATATGTAAAAAGTACTAACTGAGAATGGCCACAGGATTAAGGAATATCCCTTCCATTCAAT  
CTAGAGGCCTGTTTGGGGCAATTGCCGGCTTTATTGAAGGAGGCTGGACAGGAATGATAGATGG  
GTGGTACGGTTATCATCATCAAAATGAGCAGGGATCAGGGTATGCAGCCGACCTGAAGAGCACA  
CAGAGTGCCATTGACGGAATCACTAACAAGGTTAATTCTGTTATTGAAAAGATGAACACACAAT  
TCACTGCTGTAGGTAAAGAGTTTCAGCCACTTGGAAAGGAGAATAGAGAATTTAAACAAAAAGGT  
TGATGATGGGTTTCTGGACATTTGGACTTACAATGCCGAACCTGTTGGTTCTATTGGAAAATGAAA  
GAACTCTGGATTACCACGATTCAAATGTGAAAACCTTGATGAAAAGGTAAGAAGCCAACTAAA  
AAACAATGCCAAGGAAATTGGAAATGGCTGTTTTGAATTTTACCACAAATGTGATGACACGTGC  
ATGGAAAGCGTCAAAAATGGAACCTATGACTACCCAAAGTACTCAGAGGAAGCAAACTAAAC  
AGGGAGGAAATAGATGGGGTAAAGTTGGAATCAACAAGGATTTACCAAATTTTGGCGATCTATT  
CAACAGTCGCCAGTTCGTTGGTACTGGTAGTCTCCCTGGGGGCAATCAGTTTCTGGATGTGCTCTA  
ATGGGTCGCTACAGTGCAGAATATGTATTTAA

**Table S1.** Set of the 63 HA sequences used for the nucleotide alignment that resulted in the conH1 sequence listed above.

### Cross-reactivity between H1N1 porcine antisera and ORFV<sup>Δ121</sup>conH1

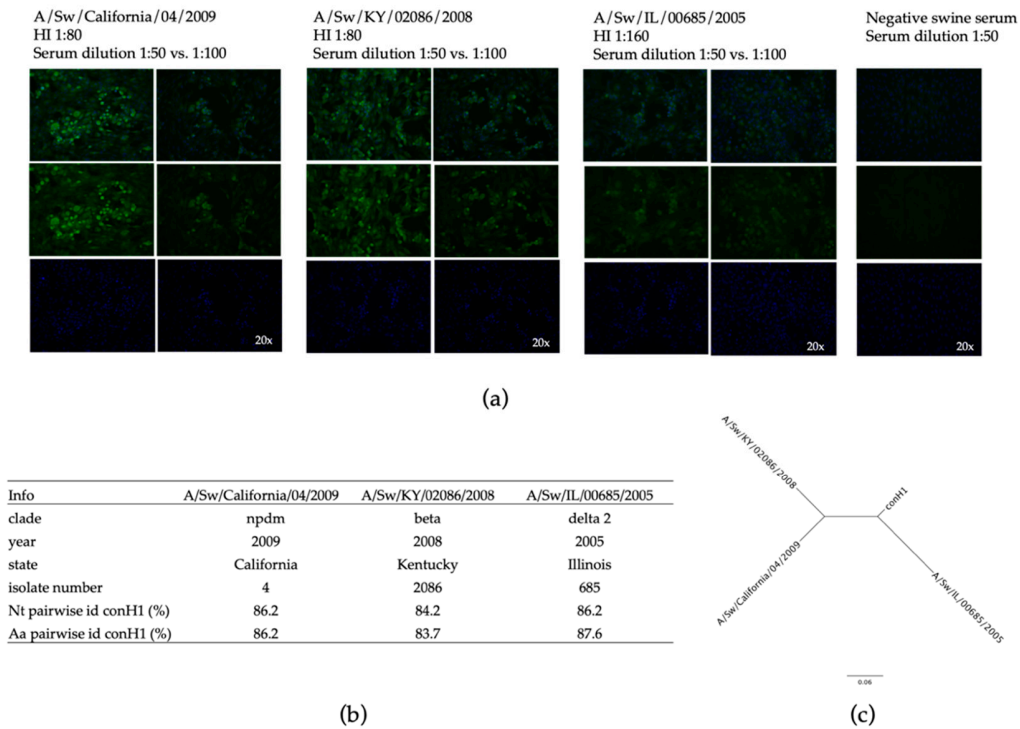

**Figure S1.** Cross-reactivity between divergent porcine antisera and ORFV<sup>Δ121</sup>conH1. (a) The cross-reactivity between serum of pigs infected with 3 different strains of H1N1 IAV-S and conH1 expressed on the cell surface of OFTu permeabilized cells was assessed by IFA. Positive cross-reactivity is showed by the green fluorescence, suggesting that the conH1 expressed by the recombinant ORFV<sup>Δ121</sup>conH1 virus was recognized by the host serum from infected animals. (b) Informative table about the IAV-S isolates used for the cross-reactivity sera assay, including the pairwise identities (c) Phylogenetic tree based on the nucleotide sequences of the HAs from these same isolates to evaluate genetic distance of with the conH1.

| Immune cell phenotypes                                                                                                                             | Animals challenged with A/Sw/OH/24366/2007 | Animal challenged with A/California/04/2009 |
|----------------------------------------------------------------------------------------------------------------------------------------------------|--------------------------------------------|---------------------------------------------|
| IL-17A <sup>+</sup> CTLs in PBMCs<br>[CD3 <sup>+</sup> CD4 <sup>+</sup> CD8α <sup>+</sup> CD8β <sup>+</sup> IL-17A <sup>+</sup> ]                  | *P < 0.05                                  | *P < 0.05                                   |
| IL-17A <sup>+</sup> T-helper/Memory cells in PBMCs<br>[CD3 <sup>+</sup> CD4 <sup>+</sup> CD8α <sup>+</sup> CD8β <sup>+</sup> IL-17A <sup>+</sup> ] | -                                          | ***P < 0.0001.                              |
| IFNγ <sup>+</sup> T-helper/Memory cells in PBMCs<br>[CD3 <sup>+</sup> CD4 <sup>+</sup> CD8α <sup>+</sup> CD8β <sup>+</sup> IFNγ <sup>+</sup> ]     | *P < 0.05                                  | ***P < 0.001                                |
| IFNγ <sup>+</sup> CTLs in PBMCs<br>[CD3 <sup>+</sup> CD4 <sup>+</sup> CD8α <sup>+</sup> CD8β <sup>+</sup> IFNγ <sup>+</sup> ]                      | *P < 0.05                                  | *P < 0.05, **P < 0.01                       |
| IL-17A <sup>+</sup> T-lymphocytes in BAL cells<br>[CD3 <sup>+</sup> CD8α <sup>+</sup> CD8β <sup>+</sup> IL-17A <sup>+</sup> ]                      | *P < 0.05                                  | *P < 0.05                                   |

|                                                                                                                                                          |              |              |
|----------------------------------------------------------------------------------------------------------------------------------------------------------|--------------|--------------|
| IFN $\gamma$ <sup>+</sup> T-lymphocytes in BAL cells<br>[CD3 <sup>+</sup> CD8 $\alpha$ <sup>+</sup> CD8 $\beta$ <sup>+</sup> IFN $\gamma$ <sup>+</sup> ] | ***P < 0.001 | -            |
| IL-17A <sup>+</sup> T-lymphocytes in TBLN MNCs<br>[CD3 <sup>+</sup> CD8 $\alpha$ <sup>+</sup> CD8 $\beta$ <sup>+</sup> IL-17A <sup>+</sup> ]             | -            | *P < 0.05    |
| IFN $\gamma$ <sup>+</sup> T-lymphocytes in TBLN MNCs<br>[CD3 <sup>+</sup> CD8 $\alpha$ <sup>+</sup> CD8 $\beta$ <sup>+</sup> IFN $\gamma$ <sup>+</sup> ] | -            | ***P < 0.001 |

**Table S2.** Summary of significantly upregulated immune cells,
